## Chronic obstructive pulmonary disease in heart failure: influence on circulating biomarkers and outcome

A. Aimo<sup>1</sup>, G. Vergaro<sup>2</sup>, J. Januzzi<sup>3</sup>, A.M. Richards<sup>4</sup>, C.S.P. Lam<sup>5</sup>, R. Latini<sup>6</sup>, I.S. Anand<sup>7</sup>, T. Ueland<sup>8</sup>, H.P. Brunner-La Rocca<sup>9</sup>, A. Bayes-Genis<sup>10</sup>, R.A. De Boer<sup>11</sup>, H.K. Gaggin<sup>3</sup>, K. Huber<sup>12</sup>, C. Passino<sup>1</sup>, M. Emdin<sup>1</sup>

<sup>1</sup>Scuola Superiore Sant'Anna, Pisa, Italy; <sup>2</sup>Fondazione Toscana Gabriele Monasterio, Pisa, Italy; <sup>3</sup>Massachusetts General Hospital - Harvard Medical School, Boston, United States of America; <sup>4</sup>University of Otago Christchurch, Christchurch, New Zealand; <sup>5</sup>Singapore General Hospital, Singapore, Singapore; <sup>6</sup>IRCCS - Istituto di Ricerche Farmacologiche Mario Negri, Milan, Italy; <sup>7</sup>University of Minnesota, Minneapolis, United States of America; <sup>8</sup>University of Oslo, Oslo, Norway; <sup>9</sup>Maastricht University Medical Centre (MUMC), Maastricht, Netherlands (The); <sup>10</sup>Germans Trias i Pujol Hospital, Badalona, Spain; <sup>11</sup>University Medical Center Groningen, Groningen, Netherlands (The); <sup>12</sup>Wilhelminen Hospital, Vienna, Austria

**Funding Acknowledgement:** Type of funding source: None

**Background:** Chronic obstructive pulmonary disease (COPD) is common in patients with chronic heart failure (CHF).

**Purpose:** We aimed to explore the impact of COPD on HF biomarkers (N-terminal fraction of pro-B-type natriuretic peptide [NT-proBNP], high-sensitivity troponin T [hs-TnT], and soluble suppression of tumorigenesis-2 [sST2]) and outcome.

**Methods:** Individual data from 14 cohorts of patients with stable chronic HF and NT-proBNP and hs-TnT values were analysed. Patients with known COPD status were evaluated.

**Results:** Patients (n=13,178) were aged 67 years (58–75), 75% males, and 76%, 11%, 13% with HF with reduced, mid-range, or preserved ejection fraction (HFrEF/HFmrEF/HFpEF), respectively. Patients with COPD were older than those without COPD (age 71 years [64–77] vs. 66 [57–75];  $p<0.001$ ), more frequently males (79% vs. 74%;  $p<0.001$ ), had more often ischaemic HF (54% vs. 52%;  $p<0.001$ ), and HFpEF (14% vs. 12%;  $p=0.011$ ), but not HFmrEF (12% vs. 11%;  $p=0.097$ ). COPD patients had also more severe dyspnoea (44% in NYHA class III-IV vs. 31%;  $p<0.001$ ), and slightly worse renal function (median estimated glomerular filtration rate [eGFR] 58 mL/min/1.73 m<sup>2</sup> [44–74] vs. 60 [46–67];  $p<0.001$ ). Patients with COPD had higher NT-proBNP (1501 ng/L [642–3333] vs. 1225 ng/L [476–

2902];  $p<0.001$ ), hs-TnT (22 ng/L [13–38] vs. 17 ng/L [9–30];  $p<0.001$ ), and sST2 (30 ng/mL [22–45] vs. 29 [21–43];  $p<0.001$ ).

Over a median follow-up of 2.1 years (1.5–3.7, range 0–18 years), 3,865/12,489 patients (31%) died; among them, 2,443/12,450 (20%) died for cardiovascular causes; 3,373/12,469 patients (27%) were hospitalized for HF over 35 months (15–63, range 0–216 months). Patients with COPD had a significantly higher all-cause mortality, cardiovascular mortality, and worse survival free from HF hospitalization (all  $p<0.001$ ; Figure). In a model including age, gender, ischaemic vs. non-ischaemic aetiology, eGFR, HFrEF/HFmrEF/HFpEF, and NYHA class III-IV, COPD retained independent prognostic significance from NT-proBNP for 1-year all-cause ( $p=0.009$ ) and cardiovascular mortality ( $p=0.022$ ), 5-year all-cause ( $p<0.001$ ) and cardiovascular mortality ( $p=0.011$ ) as well as 3- ( $p=0.033$ ), 6- ( $p=0.019$ ) and 12-month HF hospitalization ( $p=0.033$ ). COPD lost its independent prognostic significance when hs-TnT and sST2 were included in the model.

**Conclusions:** COPD in HF is characterized by higher NT-proBNP, hs-TnT and sST2 levels. COPD adds prognostic significance over NT-proBNP alone, but not over the combination of NT-proBNP, hs-TnT, and sST2.

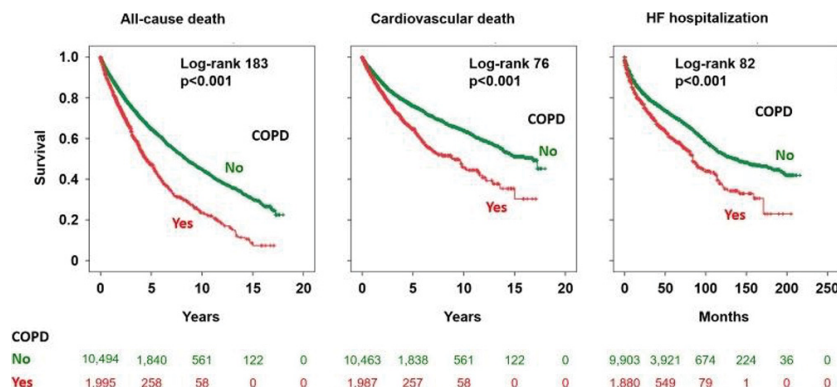

Source: http://academic.oup.com/eurheartj/article-pdf/41/Supplement_2/ehaa946.0945/34517268/ehaa946.0945.pdf
